# Supplementary material for: Intimate partner violence victimisation in early adulthood: psychometric properties of a new measure and gender differences in the Avon Longitudinal Study of Parents and Children
Source: PubMed Central journal article supplement (PMC6475136; doi:10.1136/bmjopen-2018-025621), 2019-03-23
Supplement: bmjopen-2018-025621supp001.pdf [file bmjopen-2018-025621supp001.pdf]

Appendix: PSYCHOMETRIC PROPERTIES AND GENDER DIFFERENCES IN IPV

**Table A1: Polychoric correlations between ordinal IPV items**

|                        | Control | Humiliate | Push, slap | Punch, strangle | Coerced touch | Forced touch | Coerced sex | Forced sex |
|------------------------|---------|-----------|------------|-----------------|---------------|--------------|-------------|------------|
| <b>Control</b>         | 1       |           |            |                 |               |              |             |            |
| <b>Humiliate</b>       | .764    | 1         |            |                 |               |              |             |            |
| <b>Push, slap</b>      | .728    | .812      | 1          |                 |               |              |             |            |
| <b>Punch, strangle</b> | .727    | .786      | .923       | 1               |               |              |             |            |
| <b>Coerced touch</b>   | .592    | .570      | .630       | .589            | 1             |              |             |            |
| <b>Forced touch</b>    | .591    | .569      | .677       | .649            | .923          | 1            |             |            |
| <b>Coerced sex</b>     | .627    | .598      | .640       | .591            | .882          | .827         | 1           |            |
| <b>Forced sex</b>      | .593    | .602      | .742       | .720            | .812          | .890         | .854        | 1          |

Note. N=3,158. Response categories for all variables were 0=never, 1=once, 2=a few times, and 3=often. Full item descriptions are shown in Table 1.

**Table A2: Exploratory factor analysis (total sample)**

| Item                                    | Single factor solution |            | Two-factor solution (r=64.97%) |              |            |
|-----------------------------------------|------------------------|------------|--------------------------------|--------------|------------|
|                                         | Factor 1               | Uniqueness | Factor 1                       | Factor 2     | Uniqueness |
| Control                                 | .771                   | .406       | -                              | .705         | .344       |
| Humiliate                               | .792                   | .373       | -                              | .842         | .249       |
| Push, slap                              | .881                   | .224       | -                              | .877         | .106       |
| Punch, strangle                         | .855                   | .269       | -                              | .905         | .127       |
| Coerced touch                           | .870                   | .243       | .951                           | -            | .098       |
| Forced touch                            | .891                   | .207       | .913                           | -            | .092       |
| Coerced sex                             | .866                   | .251       | .862                           | -            | .156       |
| Forced sex                              | .898                   | .193       | .770                           | -            | .147       |
| <b>Factor eigenvalue:</b>               | <b>5.834</b>           |            | <b>5.834</b>                   | <b>0.847</b> |            |
| <b>Proportion of variance explained</b> | <b>.865</b>            |            | <b>.865</b>                    | <b>.126</b>  |            |

Note. N=3,158. Method is principal factors using a polychoric correlation matrix. Two-factor solution uses oblique rotation (promax). Factor loadings <.4 are suppressed. Full item descriptions are shown in Table 1.

**Table A3: Exploratory factor analysis (women only)**

| Item                                    | Single factor solution |            | Two-factor solution (r=63.86%) |              |            |
|-----------------------------------------|------------------------|------------|--------------------------------|--------------|------------|
|                                         | Factor 1               | Uniqueness | Factor 1                       | Factor 2     | Uniqueness |
| Control                                 | .786                   | .382       | -                              | .714         | .322       |
| Humiliate                               | .805                   | .351       | -                              | .863         | .220       |
| Push, slap                              | .886                   | .215       | -                              | .887         | .096       |
| Punch, strangle                         | .860                   | .260       | -                              | .928         | .106       |
| Coerced touch                           | .858                   | .264       | .948                           | -            | .107       |
| Forced touch                            | .878                   | .230       | .929                           | -            | .093       |
| Coerced sex                             | .860                   | .261       | .853                           | -            | .162       |
| Forced sex                              | .892                   | .205       | .755                           | -            | .158       |
| <b>Factor eigenvalue:</b>               | <b>5.832</b>           |            | <b>5.832</b>                   | <b>0.903</b> |            |
| <b>Proportion of variance explained</b> | <b>.853</b>            |            | <b>.853</b>                    | <b>.132</b>  |            |

Note. N=2,050 women. Method is principal factors using a polychoric correlation matrix. Two-factor solution uses oblique rotation (promax). Factor loadings <.4 are suppressed. Full item descriptions are shown in Table 1.

Appendix: PSYCHOMETRIC PROPERTIES AND GENDER DIFFERENCES IN IPV

**Table A4: Exploratory factor analysis (men only)**

| Item                                    | Single factor solution |            | Two-factor solution (r=59.60%) |              |            |
|-----------------------------------------|------------------------|------------|--------------------------------|--------------|------------|
|                                         | Factor 1               | Uniqueness | Factor 1                       | Factor 2     | Uniqueness |
| Control                                 | .790                   | .377       | -                              | .751         | .294       |
| Humiliate                               | .749                   | .439       | -                              | .896         | .248       |
| Push, slap                              | .869                   | .245       | -                              | .739         | .188       |
| Punch, strangle                         | .776                   | .398       | -                              | .934         | .189       |
| Coerced touch                           | .876                   | .233       | .928                           | -            | .086       |
| Forced touch                            | .926                   | .142       | .646                           | -            | .132       |
| Coerced sex                             | .822                   | .325       | .876                           | -            | .192       |
| Forced sex                              | .822                   | .325       | .992                           | -            | .104       |
| <b>Factor eigenvalue:</b>               | <b>5.518</b>           |            | <b>5.518</b>                   | <b>1.049</b> |            |
| <b>Proportion of variance explained</b> | <b>.690</b>            |            | <b>.690</b>                    | <b>.131</b>  |            |

Note. N=1,108 men. Method is principal factors using a polychoric correlation matrix, forced to be positive definite. Two-factor solution uses oblique rotation (promax). Factor loadings <.4 are suppressed. Full item descriptions are shown in Table 1.

**Table A5: Polychoric correlations between IPV impact items**

|                      | Frightened | Upset | Affect work | Sad   | Anxious | Depressed | Substance use | Angry | No effect | Loved | Funny |
|----------------------|------------|-------|-------------|-------|---------|-----------|---------------|-------|-----------|-------|-------|
| <b>Frightened</b>    | 1          |       |             |       |         |           |               |       |           |       |       |
| <b>Upset</b>         | .717       | 1     |             |       |         |           |               |       |           |       |       |
| <b>Affect work</b>   | .621       | .721  | 1           |       |         |           |               |       |           |       |       |
| <b>Sad</b>           | .663       | .893  | .799        | 1     |         |           |               |       |           |       |       |
| <b>Anxious</b>       | .701       | .693  | .724        | .631  | 1       |           |               |       |           |       |       |
| <b>Depressed</b>     | .646       | .732  | .776        | .778  | .747    | 1         |               |       |           |       |       |
| <b>Substance use</b> | .379       | .400  | .480        | .406  | .452    | .531      | 1             |       |           |       |       |
| <b>Angry</b>         | .343       | .660  | .318        | .558  | .401    | .426      | .297          | 1     |           |       |       |
| <b>No effect</b>     | -.627      | -.862 | -.590       | -.820 | -.686   | -.678     | -.264         | -.631 | 1         |       |       |
| <b>Loved</b>         | -.178      | -.468 | -.162       | -.376 | -.148   | -.164     | -.018         | -.301 | .419      | 1     |       |
| <b>Funny</b>         | -.478      | -.522 | -.318       | -.422 | -.472   | -.454     | -.093         | -.392 | .639      | .432  | 1     |

Note. N=1,092. Participants only responded if they had experienced any IPV victimisation. Response categories for all variables were 0=no, 1=yes. Full item descriptions are shown in Table 2.

**Table A6: Age of occurrence among those who had experienced IPV**

| Item                                                                                                                                 | Total N | N (%)       |             |             |
|--------------------------------------------------------------------------------------------------------------------------------------|---------|-------------|-------------|-------------|
|                                                                                                                                      |         | Under 18    | Over 18     | Both        |
| Told you who you could see and where you could go and/or regularly checked what you were doing and where you were (by phone or text) | 953     | 201 (21.09) | 569 (59.71) | 183 (19.20) |
| Made fun of you, called you hurtful names, shouted at you                                                                            | 1,022   | 171 (16.73) | 666 (65.17) | 185 (18.10) |
| Used physical force such as pushing, slapping, hitting or holding you down                                                           | 743     | 137 (18.44) | 468 (62.99) | 138 (18.57) |
| Used more severe physical force such as punching, strangling, beating you up, hitting you with an object                             | 481     | 70 (14.55)  | 293 (60.91) | 118 (24.53) |
| Pressured you into kissing/touching/something else                                                                                   | 569     | 109 (19.16) | 337 (59.23) | 123 (21.62) |
| Physically forced you into kissing/touching/something else                                                                           | 437     | 74 (16.93)  | 255 (58.35) | 108 (24.71) |
| Pressured you into having sexual intercourse                                                                                         | 631     | 135 (21.39) | 371 (58.80) | 125 (19.91) |
| Physically forced you into having sexual intercourse                                                                                 | 413     | 65 (15.74)  | 244 (59.08) | 104 (25.18) |
